# Supplementary material for: A cross‐sectional study of MRI features and the gut microbiome in pediatric‐onset multiple sclerosis
Source: PubMed Central journal article supplement — Ann Clin Transl Neurol. 2023 Dec 21;11(2):486–96. doi: 10.1002/acn3.51970 (PMC10863907; doi:10.1002/acn3.51970), 2023-12-21
Supplement: ACN3-11-486-s001.pdf [file ACN3-11-486-s001.pdf]

## Supplementary Materials

### A Cross-Sectional Study of MRI Features and the Gut Microbiome in Pediatric-Onset Multiple Sclerosis

Feng Zhu, Yinshan Zhao, Douglas L Arnold, Amit Bar-Or, Charles N Bernstein, Christine Bonner, Morag Graham, Janace Hart, Natalie Knox, Ruth Ann Marrie, Ali I Mirza, Julia O'Mahony, Gary Van Domselaar, E. Ann Yeh, Brenda Banwell, Emmanuelle Waubant, Helen Tremlett  
US Network of Pediatric MS Centers, the Canadian Pediatric Demyelinating Disease Network

Figure S1 Cohort flow chart

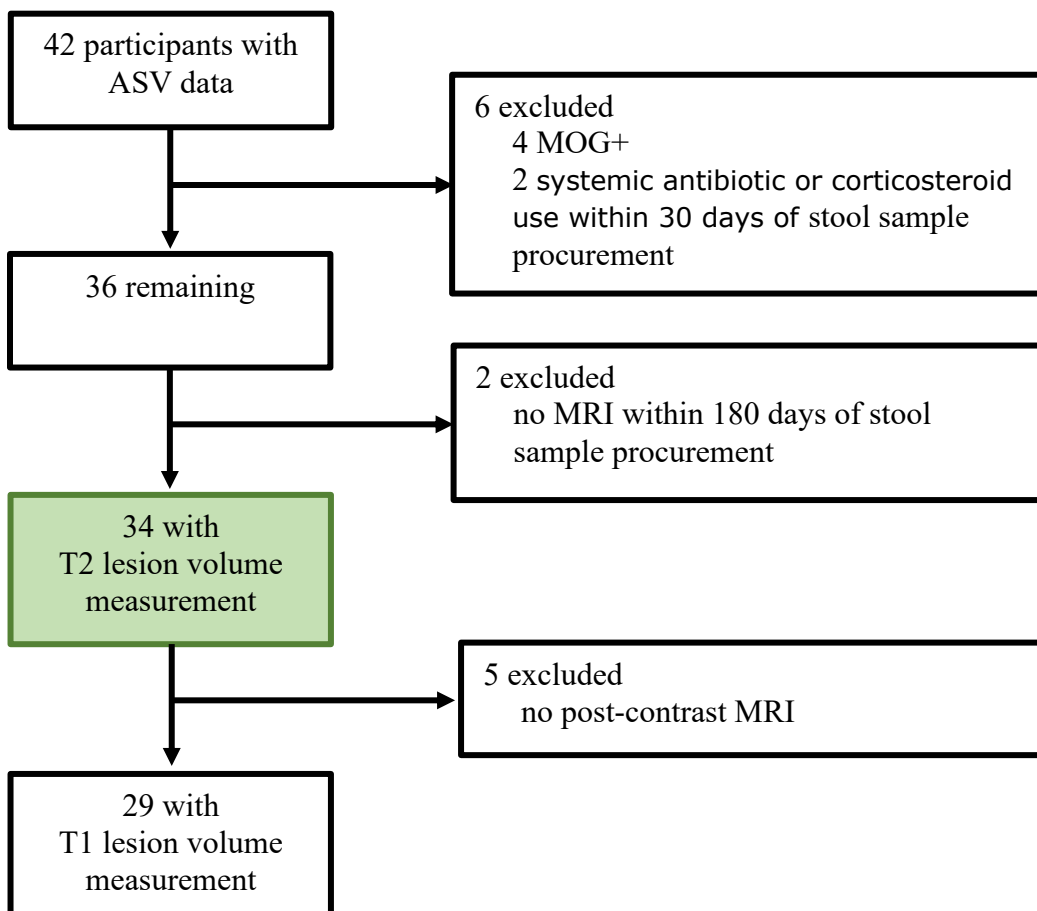

#### Abbreviations:

ASV = amplicon sequence variants

MOG+ = positive for serum myelin oligodendrocyte glycoprotein antibodies

(29 had a MOG test and 13 did not have a test)

## Alpha Diversity

In the microbiome context, alpha diversity describes the diversity within a microbial community. Different alpha diversity measures exist which summarize the richness (total number of taxonomic groups present in the community), evenness (relative abundance of the groups), or both.

**Table S1** Alpha diversity measures used in this study

| Diversity index | Shannon index                                                                                                                                                                                                                                                                                                           |
|-----------------|-------------------------------------------------------------------------------------------------------------------------------------------------------------------------------------------------------------------------------------------------------------------------------------------------------------------------|
| Description     | A measure that reflects both the evenness and the richness. The Shannon index quantifies the uncertainty in predicting the identity of a taxonomic member that is randomly selected from the community. The index value increases as the number of taxonomic groups increases and as the groups distribute more evenly. |
| Formula         | $-\sum_{i=0}^s (p_i \ln p_i)$                                                                                                                                                                                                                                                                                           |
| Reference       | Shannon, C.E. <i>A mathematical theory of communication</i> . Bell Syst. Tech. J, 1948. <b>27</b> : p. 379–423.                                                                                                                                                                                                         |
| Diversity index | Margalef's index                                                                                                                                                                                                                                                                                                        |
| Description     | A measures richness adjusted for library size (the total number of sequences in the sample).                                                                                                                                                                                                                            |
| Formula         | $\frac{s}{\ln N}$                                                                                                                                                                                                                                                                                                       |
| Reference       | Margalef, R. <i>Information theory in ecology</i> . General Systems, 1958. <b>3</b> : p. 36–71.                                                                                                                                                                                                                         |
| Diversity index | Chao1 index                                                                                                                                                                                                                                                                                                             |
| Description     | A measure of richness which is an estimate of the expected number of taxonomic groups in the community based on the observed number of groups in the sample. The Chao1 index accounts for unobserved rare taxa and gives more weight to the low abundance groups.                                                       |
| Formula         | $s + \frac{F_1(F_1 - 1)}{2(F_2 + 1)}$                                                                                                                                                                                                                                                                                   |
| Reference       | Chao A. <i>Non-parametric estimation of the number of classes in a population</i> . Scand. J. Stat, 1984. <b>11</b> : p. 265-270.                                                                                                                                                                                       |

Notation:  $s$  is the total number of taxonomic groups in the sample,  $p_i$  is the proportion of the sample represented by group  $i$ ,  $N$  is the total number of sequences in the sample (library size), and,  $F_1$  and  $F_2$  are the number of groups that are only observed once or twice in the sample.

**Table S2** Pearson’s product-moment correlation between participant characteristics and lesion volumes

| Characteristic          | T2 lesion volume<br>Correlation (p-value) | T1 lesion volume<br>Correlation (p-value) |
|-------------------------|-------------------------------------------|-------------------------------------------|
| Age at MRI              | 0.33 (0.06)                               | 0.33 (0.08)                               |
| Age at symptom onset    | 0.18 (0.30)                               | 0.15 (0.43)                               |
| Disease duration at MRI | 0.24 (0.17)                               | 0.25 (0.20)                               |

**Table S3** P-value for comparison of lesion volumes by participant characteristics based on the Kruskal–Wallis rank sum test

| Characteristic                                         | T2 lesion volume | T1 lesion volume |
|--------------------------------------------------------|------------------|------------------|
| Sex                                                    | 0.17             | 0.17             |
| Bristol Stool Scale (hard, normal, loose)              | 0.68             | 1.00             |
| Country of residence (Canada vs USA)                   | 0.71             | 0.59             |
| Body Mass Index (obese vs normal)                      | 0.30             | 0.11             |
| Disease modifying drug exposure status (ever vs never) | 0.19             | 0.16             |

**Table S4** Number of participants with non-zero count and median relative abundance of taxa selected by the Lasso Regression

| Phylum                 |                     |                             | Genus                                         |                     |                             |
|------------------------|---------------------|-----------------------------|-----------------------------------------------|---------------------|-----------------------------|
| Name                   | Non-Zero Counts (n) | Relative Abundance (Median) | Name                                          | Non-Zero Counts (n) | Relative Abundance (Median) |
| <i>Tenericutes</i>     | 8                   | 0                           | -                                             | -                   | -                           |
| <i>Verrucomicrobia</i> | 20                  | 57                          | -                                             | -                   | -                           |
| <i>Actinobacteria</i>  | 34                  | 5942                        | <i>Atopobiaceae; Uncultured Adlercreutzia</i> | 7<br>23             | 0<br>56                     |
| <i>Patesibacteria</i>  | 15                  | 0                           | -                                             | -                   | -                           |
| <i>Firmicutes</i>      | 34                  | 54967                       | <i>Ruminiclostridium</i>                      | 10                  | 0                           |
|                        |                     |                             | <i>Ruminococcaceae NK4A214</i>                | 23                  | 55                          |
|                        |                     |                             | <i>Butyricoccus</i>                           | 32                  | 93                          |
|                        |                     |                             | <i>Coprococcus 3</i>                          | 29                  | 377                         |
|                        |                     |                             | <i>Eubacterium eligens</i>                    | 24                  | 65                          |
|                        |                     |                             | <i>Moryella</i>                               | 19                  | 5                           |
|                        |                     |                             | <i>Roseburia</i>                              | 31                  | 158                         |
|                        |                     |                             | <i>Ruminococcus gnavus</i>                    | 20                  | 3                           |
|                        |                     |                             | <i>Intestinibacter</i>                        | 32                  | 119                         |
|                        |                     |                             | <i>Candidatus Stoquefichus</i>                | 7                   | 0                           |
|                        |                     |                             | <i>Erysipelatoclostridium</i>                 | 27                  | 26                          |

**Figure S2** Boxplots of T2 and T1 lesion volumes by abundance level of the phyla selected from the Lasso regression

a) T2 lesion volume

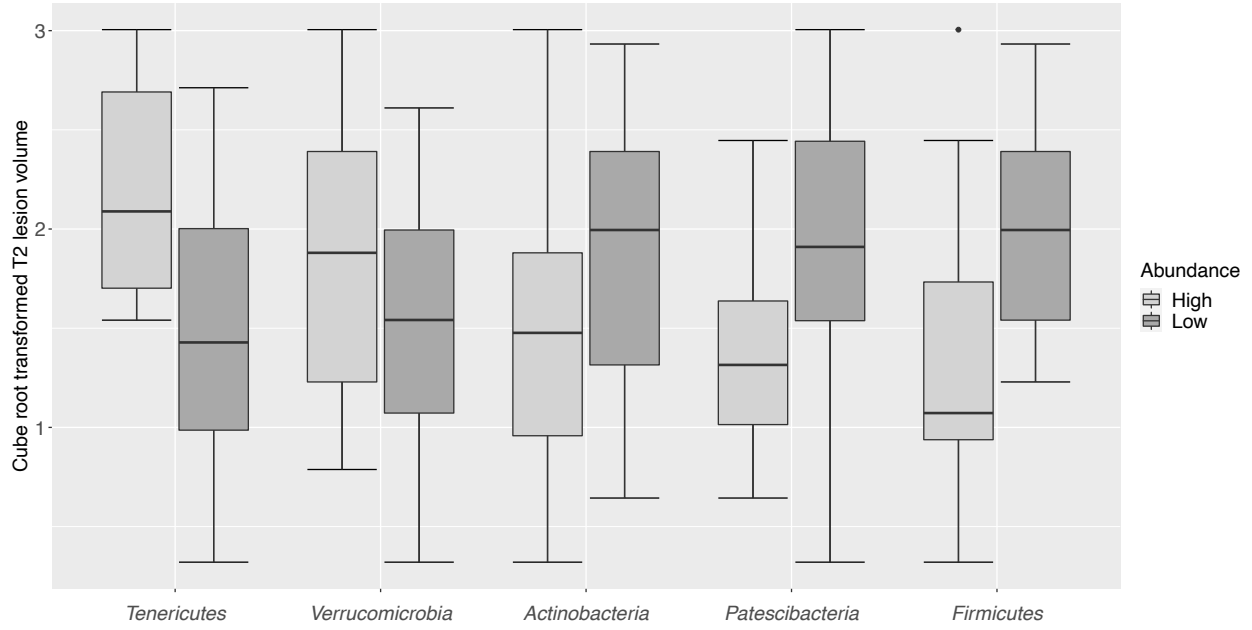

b) T1 lesion volume

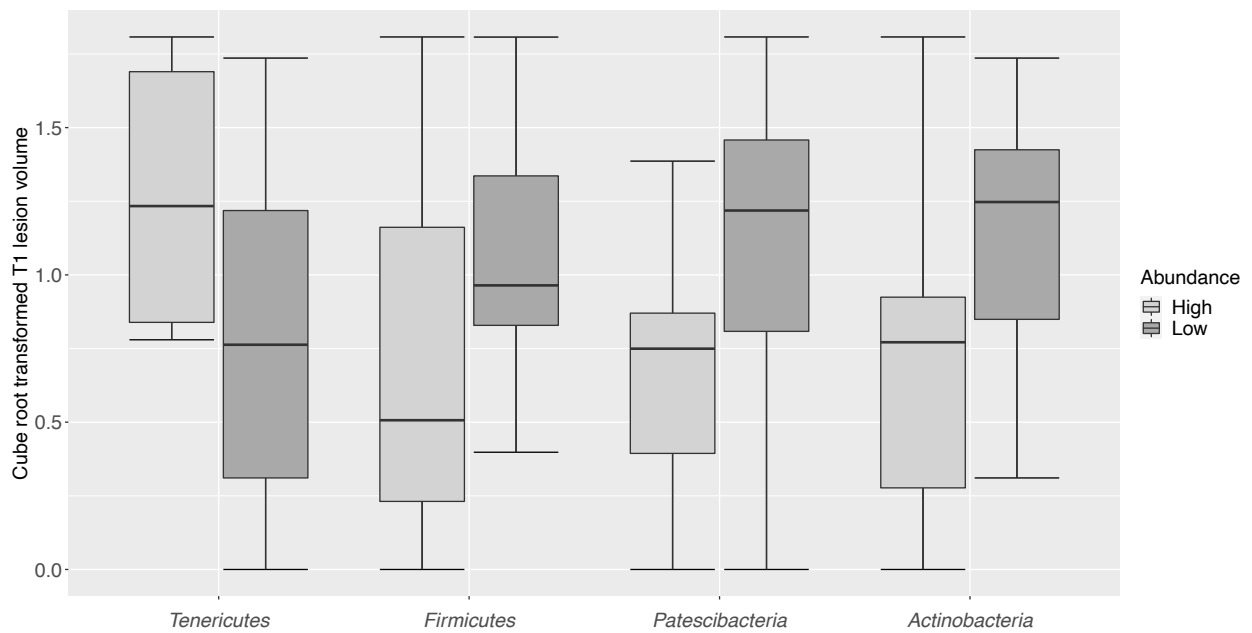

**Figure S3** Lineage of the genera selected from the Lasso regression

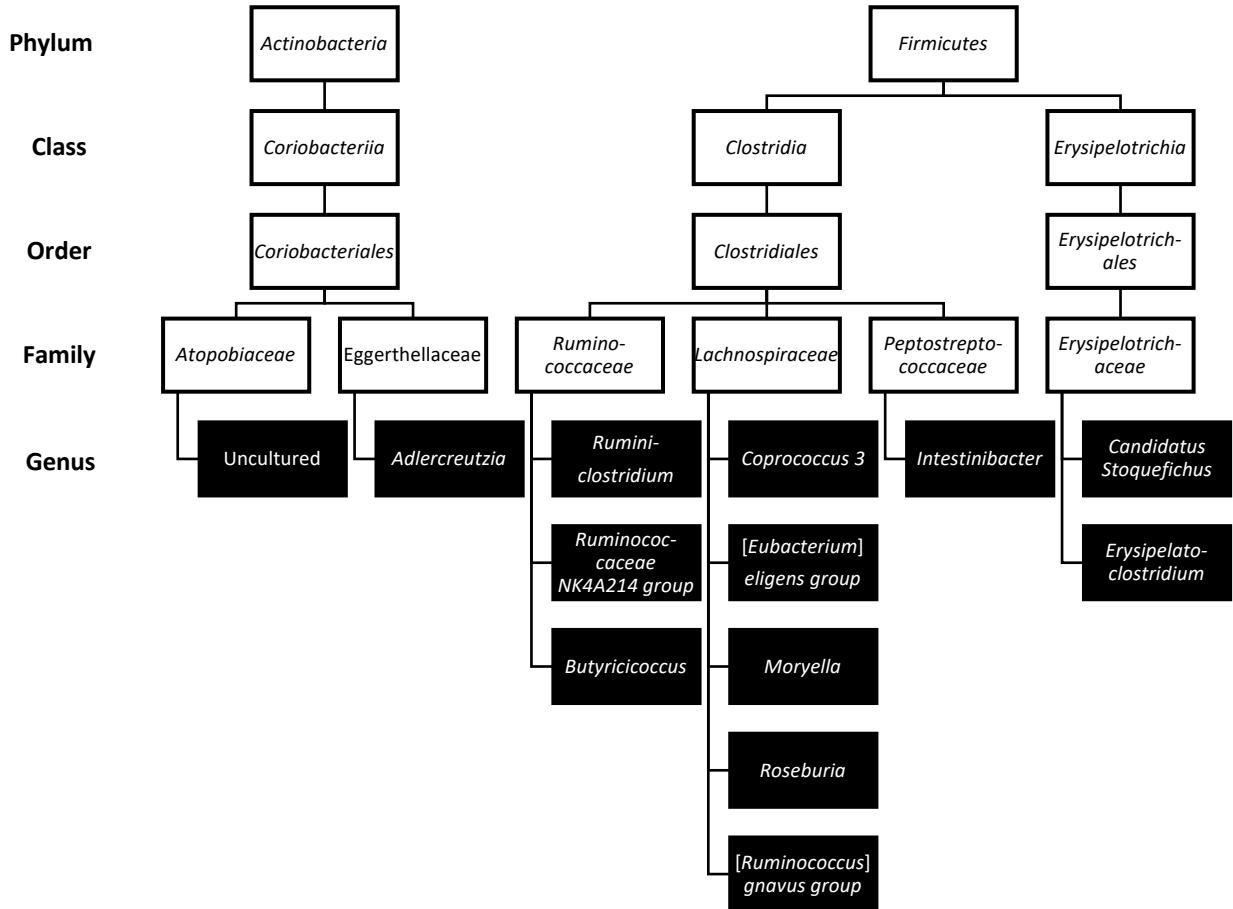

**Figure S4** Boxplots of T2 and T1 lesion volumes by abundance level of the genera selected from the Lasso regression

a) T2 lesion volume

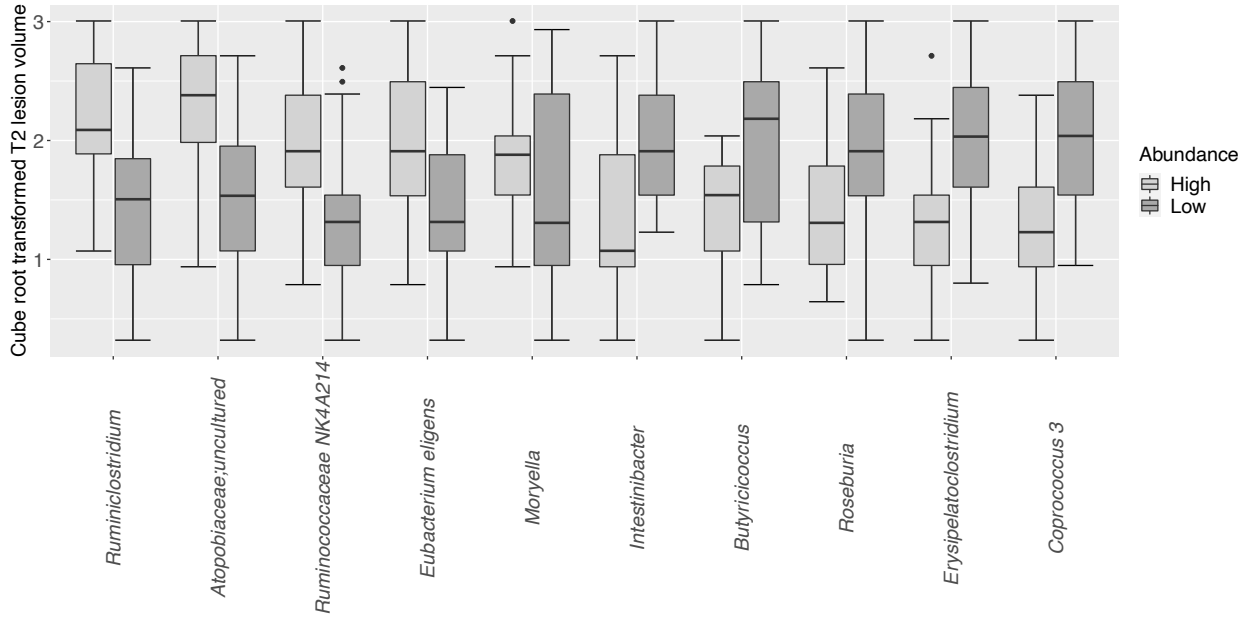

b) T1 lesion volume

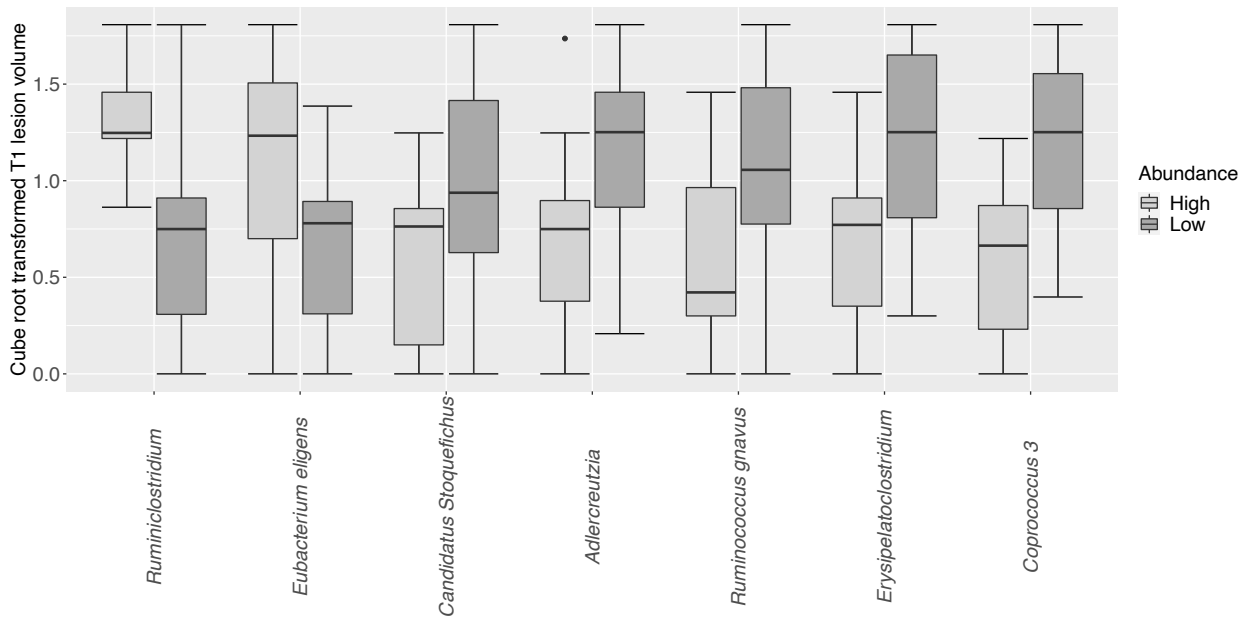

## Sensitivity Analysis

As a sensitivity analysis, we also considered the following variables in the Lasso regressions: age at MRI (continuous), sex, disease modifying drug exposure (ever vs never), country of residence (Canada vs USA), and Bristol Stool Scale (medium [types 3-5] vs hard or loose [types 1-2, 6-7]). The Bristol Stool Scale was grouped into two levels in the sensitivity analysis as only two participants' samples were categorized as loose (types 6-7).

### *Phylum-level gut microbiota*

The selected taxa and corresponding  $\beta$  coefficients with 95% confidence intervals are reported in Table S5. Three of the five phyla associated with T2 lesion volume in the original analysis were also identified in this sensitivity analysis: *Firmicutes*, *Patescibacteria* and *Tenericutes*. The directions of the associations remain unchanged. Meanwhile, *Actinobacteria* and *Verrucomicrobia* were no longer selected.

All four phyla associated with T1 lesion volume in the original analysis were also selected in the sensitivity analysis with similar  $\beta$  coefficients. In addition, the phylum *Proteobacteria* was selected with a negative, albeit small,  $\beta$  coefficient (-0.03 [-0.33, 0.00]).

No additional covariates were selected in the analysis of T2 lesion volume; whereas, male sex was identified as being associated with a lower T1 lesion volume ( $\beta$  coefficients = -0.18 [-0.47, 0.00]).

**Table S5** The  $\beta$  coefficients and 95% confidence intervals (CIs) of gut microbiota (phylum level) selected by the Lasso regression models with and without including additional covariates.

| Taxon Name             | T2 lesion Volume<br>$\beta$ coefficients (95% CIs) |                                    | T1 Lesion Volume<br>$\beta$ coefficients (95% CIs) |                                    |
|------------------------|----------------------------------------------------|------------------------------------|----------------------------------------------------|------------------------------------|
|                        | Without other covariates                           | With other covariates <sup>a</sup> | Without other covariates                           | With other covariates <sup>a</sup> |
| <i>Tenericutes</i>     | 0.37 (0.00, 0.85)                                  | 0.19 (0.00, 0.63)                  | 0.25 (0.00, 0.60)                                  | 0.30 (0.00, 0.61)                  |
| <i>Verrucomicrobia</i> | 0.07 (-0.03, 0.50)                                 | -                                  | -                                                  | -                                  |
| <i>Actinobacteria</i>  | -0.18 (-0.54, 0.00)                                | -                                  | -0.22 (-0.55, 0.00)                                | -0.24 (-0.54, 0.00)                |
| <i>Patesibacteria</i>  | -0.21 (-0.63, 0.00)                                | -0.03 (-0.45, 0.00)                | -0.18 (-0.49, 0.00)                                | -0.16 (-0.49, 0.00)                |
| <i>Firmicutes</i>      | -0.30 (-0.79, 0.00)                                | -0.25 (-0.63, 0.00)                | -0.07 (-0.48, 0.00)                                | -0.04 (-0.47, 0.00)                |
| <i>Proteobacteria</i>  | -                                                  | -                                  | -                                                  | -0.03 (-0.33, 0.00)                |

<sup>a</sup> The other covariates include: age at MRI (continuous), sex, disease modifying drug exposure (ever vs never), country of residence (Canada vs USA), and Bristol Stool Scale (medium [types 3-5] vs hard or loose [types 1-2, 6-7]).

### *Genus-level gut microbiota*

The selected taxa and corresponding  $\beta$  coefficients with 95% confidence intervals are reported in Table S6. The results remain unchanged for T2 lesion volume. For T1 lesion volume, two

genera were not selected: *Adlercreutzia* under the phylum *Actinobacteria* and *Candidatus Stoquefichus* under the phylum *Firmicutes*; both had close to null  $\beta$  coefficients in the original analysis. Again, the  $\beta$  coefficients of the selected genera were very similar to the original analysis.

Increase in age at MRI was associated with a slight increase in T2 lesion volume ( $\beta$  coefficients = 0.00 [0.00, 0.02] per year). No other covariates were selected in the analysis of T1 lesion volume.

**Table S6** The  $\beta$  coefficients and 95% confidence intervals (CIs) of gut microbiota (genus level) selected by the Lasso regression models with and without including additional covariates.

| Taxon Name                                | T2 lesion Volume<br>$\beta$ coefficients (95% CIs) |                              | T1 Lesion Volume<br>$\beta$ coefficients (95% CIs) |                              |
|-------------------------------------------|----------------------------------------------------|------------------------------|----------------------------------------------------|------------------------------|
|                                           | Without covariates                                 | With covariates <sup>a</sup> | Without covariates                                 | With covariates <sup>a</sup> |
| <i>Ruminiclostridium</i>                  | 0.10 (0.00, 0.42)                                  | 0.10 (0.00, 0.42)            | 0.18 (0.00, 0.34)                                  | 0.15 (0.00, 0.32)            |
| <i>Atopobiaceae;</i><br><i>Uncultured</i> | 0.09 (0.00, 0.41)                                  | 0.09 (0.00, 0.41)            | -                                                  | -                            |
| <i>Ruminococcaceae</i><br><i>NK4A214</i>  | 0.06 (0.00, 0.31)                                  | 0.06 (0.00, 0.31)            | -                                                  | -                            |
| <i>Eubacterium eligens</i>                | 0.03 (0.00, 0.23)                                  | 0.02 (0.00, 0.23)            | 0.04 (0.00, 0.20)                                  | 0.01 (0.00, 0.19)            |
| <i>Moryella</i>                           | 0.01 (0.00, 0.25)                                  | 0.00 (0.00, 0.25)            | -                                                  | -                            |
| <i>Intestinibacter</i>                    | -0.05 (-0.35, 0.00)                                | -0.05 (-0.35, 0.00)          | -                                                  | -                            |
| <i>Butyricicoccus</i>                     | -0.09 (-0.35, 0.00)                                | -0.09 (-0.35, 0.00)          | -                                                  | -                            |
| <i>Roseburia</i>                          | -0.09 (-0.29, 0.00)                                | -0.09 (-0.28, 0.00)          | -                                                  | -                            |
| <i>Erysipelatoclostridium</i>             | -0.24 (-0.50, 0.00)                                | -0.24 (-0.50, 0.00)          | -0.14 (-0.34, 0.00)                                | -0.12 (-0.33, 0.00)          |
| <i>Coprococcus 3</i>                      | -0.31 (-0.54, 0.00)                                | -0.31 (-0.54, 0.00)          | -0.28 (-0.52, 0.00)                                | -0.28 (-0.51, 0.00)          |
| <i>Ruminococcus</i><br><i>gnavus</i>      | -                                                  | -                            | -0.09 (-0.30, 0.00)                                | -0.06 (-0.27, 0.00)          |
| <i>Candidatus</i><br><i>Stoquefichus</i>  | -                                                  | -                            | 0.00 (-0.22, 0.00)                                 | -                            |
| <i>Adlercreutzia</i>                      | -                                                  | -                            | 0.00 (-0.36, 0.00)                                 | -                            |

<sup>a</sup> The other covariates include age at MRI (continuous), sex, disease modifying drug exposure (ever vs never), country of residence (Canada vs USA), and Bristol Stool Scale (medium [types 3-5] vs hard or loose [types 1-2, 6-7]).
